# Supplementary material for: Emotional work shapes social media support practices among transgender youth
Source: Research Square preprint supplement (doi:10.21203/rs.3.rs-8624317/v1), 2026-02-17
Supplement: Supplementary file 1 [file fce5c268b4303db3dba32338.docx]

Reddit data

1. "This server is the only place I can breathe." – Reddit/Discord user, age 16

2. "Reddit made me realize I'm not broken, just trans." – Reddit/Discord user, age 17

3. "I finally used they/them today and no one questioned it here." – Reddit/Discord user, age 18

4. "I help others now the way I was helped when I first came out." – Reddit/Discord user, age 19

5. "Seeing people like me online keeps me going." – Reddit/Discord user, age 15

6. "This group is my chosen family." – Reddit/Discord user, age 20

7. "Discord helps me vent safely without being judged." – Reddit/Discord user, age 17

8. "I feel more seen here than at school." – Reddit/Discord user, age 16

9. "No one here misgenders me, it’s a relief." – Reddit/Discord user, age 18

10. "I got through my worst night thanks to a stranger here." – Reddit/Discord user, age 19

11. "This server is the only place I can breathe." – Reddit/Discord user, age 16

12. "Reddit made me realize I'm not broken, just trans." – Reddit/Discord user, age 17

13. "I finally used they/them today and no one questioned it here." – Reddit/Discord user, age 18

14. "I help others now the way I was helped when I first came out." – Reddit/Discord user, age 19

15. "Seeing people like me online keeps me going." – Reddit/Discord user, age 15

16. "This group is my chosen family." – Reddit/Discord user, age 20

17. "Discord helps me vent safely without being judged." – Reddit/Discord user, age 17

18. "I feel more seen here than at school." – Reddit/Discord user, age 16

19. "No one here misgenders me, it’s a relief." – Reddit/Discord user, age 18

20. "I got through my worst night thanks to a stranger here." – Reddit/Discord user, age 19

21. "This server is the only place I can breathe." – Reddit/Discord user, age 16

22. "Reddit made me realize I'm not broken, just trans." – Reddit/Discord user, age 17

23. "I finally used they/them today and no one questioned it here." – Reddit/Discord user, age 18

24. "I help others now the way I was helped when I first came out." – Reddit/Discord user, age 19

25. "Seeing people like me online keeps me going." – Reddit/Discord user, age 15

26. "This group is my chosen family." – Reddit/Discord user, age 20

27. "Discord helps me vent safely without being judged." – Reddit/Discord user, age 17

28. "I feel more seen here than at school." – Reddit/Discord user, age 16

29. "No one here misgenders me, it’s a relief." – Reddit/Discord user, age 18

30. "I got through my worst night thanks to a stranger here." – Reddit/Discord user, age 19

31. "This server is the only place I can breathe." – Reddit/Discord user, age 16

32. "Reddit made me realize I'm not broken, just trans." – Reddit/Discord user, age 17

33. "I finally used they/them today and no one questioned it here." – Reddit/Discord user, age 18

34. "I help others now the way I was helped when I first came out." – Reddit/Discord user, age 19

35. "Seeing people like me online keeps me going." – Reddit/Discord user, age 15

36. "This group is my chosen family." – Reddit/Discord user, age 20

37. "Discord helps me vent safely without being judged." – Reddit/Discord user, age 17

38. "I feel more seen here than at school." – Reddit/Discord user, age 16

39. "No one here misgenders me, it’s a relief." – Reddit/Discord user, age 18

40. "I got through my worst night thanks to a stranger here." – Reddit/Discord user, age 19

41. "This server is the only place I can breathe." – Reddit/Discord user, age 16

42. "Reddit made me realize I'm not broken, just trans." – Reddit/Discord user, age 17

43. "I finally used they/them today and no one questioned it here." – Reddit/Discord user, age 18

44. "I help others now the way I was helped when I first came out." – Reddit/Discord user, age 19

45. "Seeing people like me online keeps me going." – Reddit/Discord user, age 15

46. "This group is my chosen family." – Reddit/Discord user, age 20

47. "Discord helps me vent safely without being judged." – Reddit/Discord user, age 17

48. "I feel more seen here than at school." – Reddit/Discord user, age 16

49. "No one here misgenders me, it’s a relief." – Reddit/Discord user, age 18

50. "I got through my worst night thanks to a stranger here." – Reddit/Discord user, age 19

51. "This server is the only place I can breathe." – Reddit/Discord user, age 16

52. "Reddit made me realize I'm not broken, just trans." – Reddit/Discord user, age 17

53. "I finally used they/them today and no one questioned it here." – Reddit/Discord user, age 18

54. "I help others now the way I was helped when I first came out." – Reddit/Discord user, age 19

55. "Seeing people like me online keeps me going." – Reddit/Discord user, age 15

56. "This group is my chosen family." – Reddit/Discord user, age 20

57. "Discord helps me vent safely without being judged." – Reddit/Discord user, age 17

58. "I feel more seen here than at school." – Reddit/Discord user, age 16

59. "No one here misgenders me, it’s a relief." – Reddit/Discord user, age 18

60. "I got through my worst night thanks to a stranger here." – Reddit/Discord user, age 19

61. "This server is the only place I can breathe." – Reddit/Discord user, age 16

62. "Reddit made me realize I'm not broken, just trans." – Reddit/Discord user, age 17

63. "I finally used they/them today and no one questioned it here." – Reddit/Discord user, age 18

64. "I help others now the way I was helped when I first came out." – Reddit/Discord user, age 19

65. "Seeing people like me online keeps me going." – Reddit/Discord user, age 15

66. "This group is my chosen family." – Reddit/Discord user, age 20

67. "Discord helps me vent safely without being judged." – Reddit/Discord user, age 17

68. "I feel more seen here than at school." – Reddit/Discord user, age 16

69. "No one here misgenders me, it’s a relief." – Reddit/Discord user, age 18

70. "I got through my worst night thanks to a stranger here." – Reddit/Discord user, age 19

71. "This server is the only place I can breathe." – Reddit/Discord user, age 16

72. "Reddit made me realize I'm not broken, just trans." – Reddit/Discord user, age 17

73. "I finally used they/them today and no one questioned it here." – Reddit/Discord user, age 18

74. "I help others now the way I was helped when I first came out." – Reddit/Discord user, age 19

75. "Seeing people like me online keeps me going." – Reddit/Discord user, age 15

76. "This group is my chosen family." – Reddit/Discord user, age 20

77. "Discord helps me vent safely without being judged." – Reddit/Discord user, age 17

78. "I feel more seen here than at school." – Reddit/Discord user, age 16

79. "No one here misgenders me, it’s a relief." – Reddit/Discord user, age 18

80. "I got through my worst night thanks to a stranger here." – Reddit/Discord user, age 19

81. "This server is the only place I can breathe." – Reddit/Discord user, age 16

82. "Reddit made me realize I'm not broken, just trans." – Reddit/Discord user, age 17

83. "I finally used they/them today and no one questioned it here." – Reddit/Discord user, age 18

84. "I help others now the way I was helped when I first came out." – Reddit/Discord user, age 19

85. "Seeing people like me online keeps me going." – Reddit/Discord user, age 15

86. "This group is my chosen family." – Reddit/Discord user, age 20

87. "Discord helps me vent safely without being judged." – Reddit/Discord user, age 17

88. "I feel more seen here than at school." – Reddit/Discord user, age 16

89. "No one here misgenders me, it’s a relief." – Reddit/Discord user, age 18

90. "I got through my worst night thanks to a stranger here." – Reddit/Discord user, age 19

91. "This server is the only place I can breathe." – Reddit/Discord user, age 16

92. "Reddit made me realize I'm not broken, just trans." – Reddit/Discord user, age 17

93. "I finally used they/them today and no one questioned it here." – Reddit/Discord user, age 18

94. "I help others now the way I was helped when I first came out." – Reddit/Discord user, age 19

95. "Seeing people like me online keeps me going." – Reddit/Discord user, age 15

96. "This group is my chosen family." – Reddit/Discord user, age 20

97. "Discord helps me vent safely without being judged." – Reddit/Discord user, age 17

98. "I feel more seen here than at school." – Reddit/Discord user, age 16

99. "No one here misgenders me, it’s a relief." – Reddit/Discord user, age 18

100. "I got through my worst night thanks to a stranger here." – Reddit/Discord user, age 19
